# Supplementary material for: Novel mechanisms of action contributing to benralizumab's potent anti-eosinophilic activity
Source: PubMed Central journal article supplement — Eur Respir J. 2022 Mar 3;59(3):2004306. doi: 10.1183/13993003.04306-2020 (PMC8923056; doi:10.1183/13993003.04306-2020), 2022-03-03

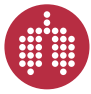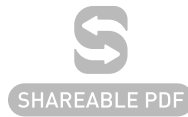

# Novel mechanisms of action contributing to benralizumab's potent anti-eosinophilic activity

Rania Dagher<sup>1,4</sup>, Varsha Kumar<sup>1</sup>, Alan M. Copenhaver<sup>1</sup>, Sandra Gallagher<sup>1</sup>, Mahboobe Ghaedi<sup>1</sup>, Jonathan Boyd<sup>2</sup>, Paul Newbold<sup>3</sup>, Alison A. Humbles<sup>1</sup> and Roland Kolbeck<sup>1,4</sup>

<sup>1</sup>Bioscience COPD/IPF, Research and Early Development, Respiratory and Immunology, BioPharmaceuticals R&D, AstraZeneca, Gaithersburg, MD, USA. <sup>2</sup>Imaging Core, Discovery Biosciences, BioPharmaceuticals R&D, AstraZeneca, Gaithersburg, MD, USA. <sup>3</sup>Late Respiratory and Immunology, BioPharmaceuticals R&D, AstraZeneca, Gaithersburg, MD, USA. <sup>4</sup>R. Dagher and R. Kolbeck contributed equally to this article as lead authors and supervised the work.

Corresponding author: Roland Kolbeck ([rkolbeck@spirovant.com](mailto:rkolbeck@spirovant.com))

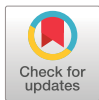

Shareable abstract (@ERSpublications)

**New insights explaining the potent anti-eosinophilic activity of benralizumab, an anti-IL-5R $\alpha$  afucosylated monoclonal antibody with enhanced depleting potency in patients with severe eosinophilic inflammation** <https://bit.ly/3yUnsnn>

**Cite this article as:** Dagher R, Kumar V, Copenhaver AM, *et al.* Novel mechanisms of action contributing to benralizumab's potent anti-eosinophilic activity. *Eur Respir J* 2022; 59: 2004306 [DOI: 10.1183/13993003.04306-2020].

This single-page version can be shared freely online.

Copyright ©The authors 2022.

This version is distributed under the terms of the Creative Commons Attribution Non-Commercial Licence 4.0. For commercial reproduction rights and permissions contact [permissions@ersnet.org](mailto:permissions@ersnet.org)

Received: 25 Nov 2020  
Accepted: 7 July 2021

## Abstract

**Background** Benralizumab is a humanised, anti-interleukin-5 receptor  $\alpha$  monoclonal antibody with anti-eosinophilic activity. Lack of fucose (afucosylation) increases its affinity to CD16a and significantly enhances antibody-dependent cell-mediated cytotoxicity by natural killer (NK) cells. Although benralizumab proved clinically efficacious in clinical trials for patients with severe asthma and hypereosinophilic syndrome, in-depth characterisation of its anti-eosinophilic mechanisms of action remains elusive.

**Methods** Here, we further investigated the mechanisms involved in benralizumab's anti-eosinophilic activities by employing relevant primary human autologous cell co-cultures and real-time-lapse imaging combined with flow cytometry.

**Results** In the presence of NK cells, benralizumab induced potent eosinophil apoptosis as demonstrated by the upstream induction of Caspase-3/7 and upregulation of cytochrome *c*. In addition, we uncovered a previously unrecognised mechanism whereby benralizumab can induce eosinophil phagocytosis/efferocytosis by macrophages, a process called antibody-dependent cellular phagocytosis. Using live cell imaging, we unravelled the stepwise processes leading to eosinophil apoptosis and uptake by activated macrophages. Through careful observations of cellular co-culture assays, we identified a novel role for macrophage-derived tumour necrosis factor (TNF) to further enhance benralizumab-mediated eosinophil apoptosis through activation of TNF receptor 1 on eosinophils. TNF-induced eosinophil apoptosis was associated with cytochrome *c* upregulation, mitochondrial membrane depolarisation and increased Caspase-3/7 activity. Moreover, activated NK cells were found to amplify this axis through the secretion of interferon- $\gamma$ , subsequently driving TNF expression by macrophages.

**Conclusions** Our data provide deeper insights into the timely appearance of events leading to benralizumab-induced eosinophil apoptosis and suggest that additional mechanisms may contribute to the potent anti-eosinophilic activity of benralizumab *in vivo*. Importantly, afucosylation of benralizumab strongly enhanced its potency for all mechanisms investigated.

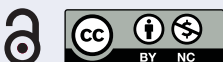

Supplement: ERJ-04306-2020.Shareable.pdf [file ERJ-04306-2020.Shareable.pdf]
